# Supplementary material for: Crucial roles of the pentatricopeptide repeat protein SOAR1 in Arabidopsis response to drought, salt and cold stresses
Source: PubMed Central journal article supplement (PMC4486114; doi:10.1007/s11103-015-0327-9), 2015-06-21
Supplement: 11103_2015_327_MOESM1_ESM.pdf [file 11103_2015_327_MOESM1_ESM.pdf]

# Supplementary Data

Jiang *et al.*, Crucial roles of the pentatricopeptide repeat protein SOAR1 in *Arabidopsis* response to drought, salt and cold stresses

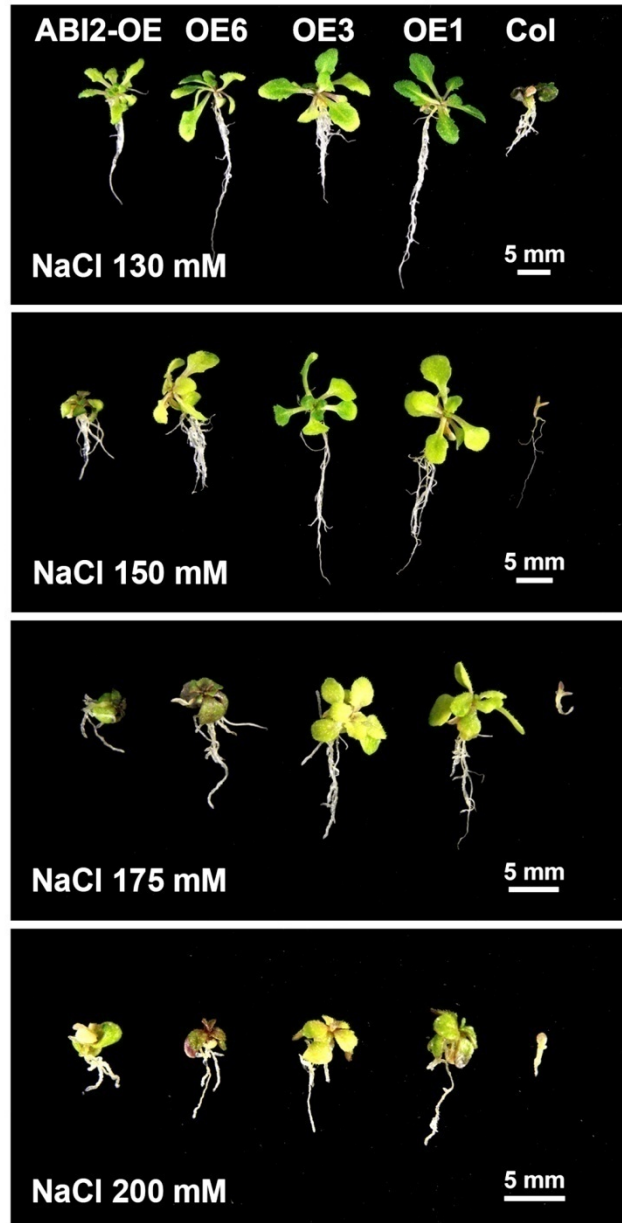

**Fig. S1.** Postgermination growth of the *SOAR1*-overexpression lines under salt stress. Postgermination growth of the wild-type Col, three *SOAR1*-overexpression lines (OE1, OE3 and OE6) and an *ABI2*-overexpression line (*ABI2*-OE) in the MS medium containing, 130, 150, 175, and 200 mM NaCl, was recorded 18 d after stratification. The entire experiment was replicated three times with similar results. Bars indicate 5 mm.

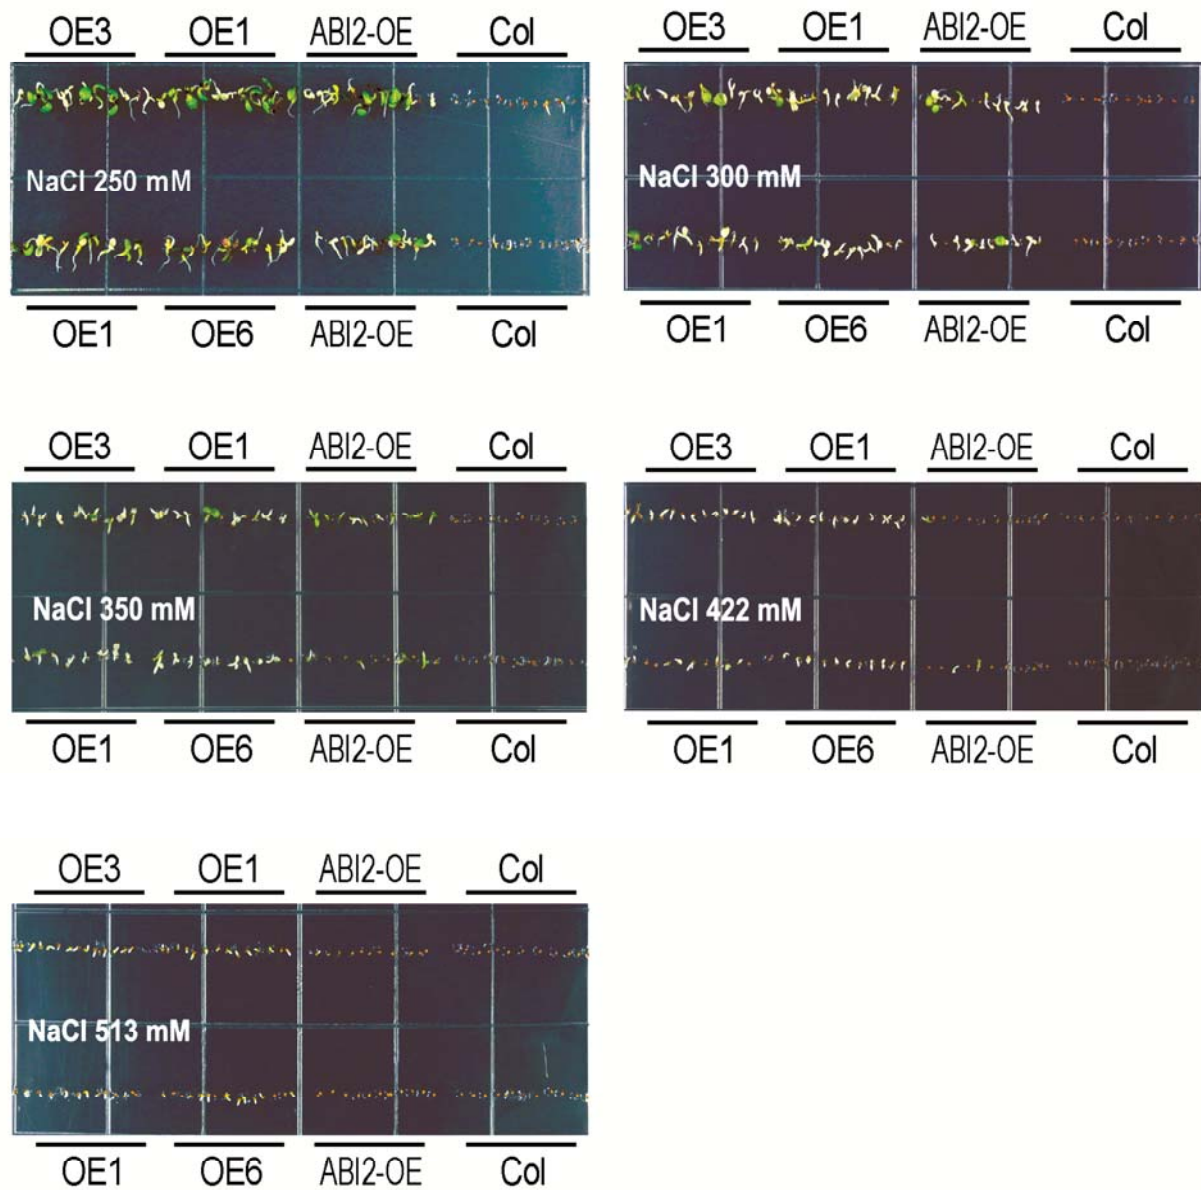

Fig. S2. Test of the extremity of the NaCl concentrations under which seeds of the *SOAR1*-overexpression lines germinate and continue to grow (pictures in plates). Germination and postgermination growth of the wild-type Col, an *ABI2*-overexpression line (*ABI2*-OE) and three *SOAR1*-overexpression lines OE1, OE3 and OE6 in the MS medium containing 250, 300, 350, 422, and 513 mM NaCl, were investigated two weeks after stratification. The entire experiment was replicated three times with similar results.

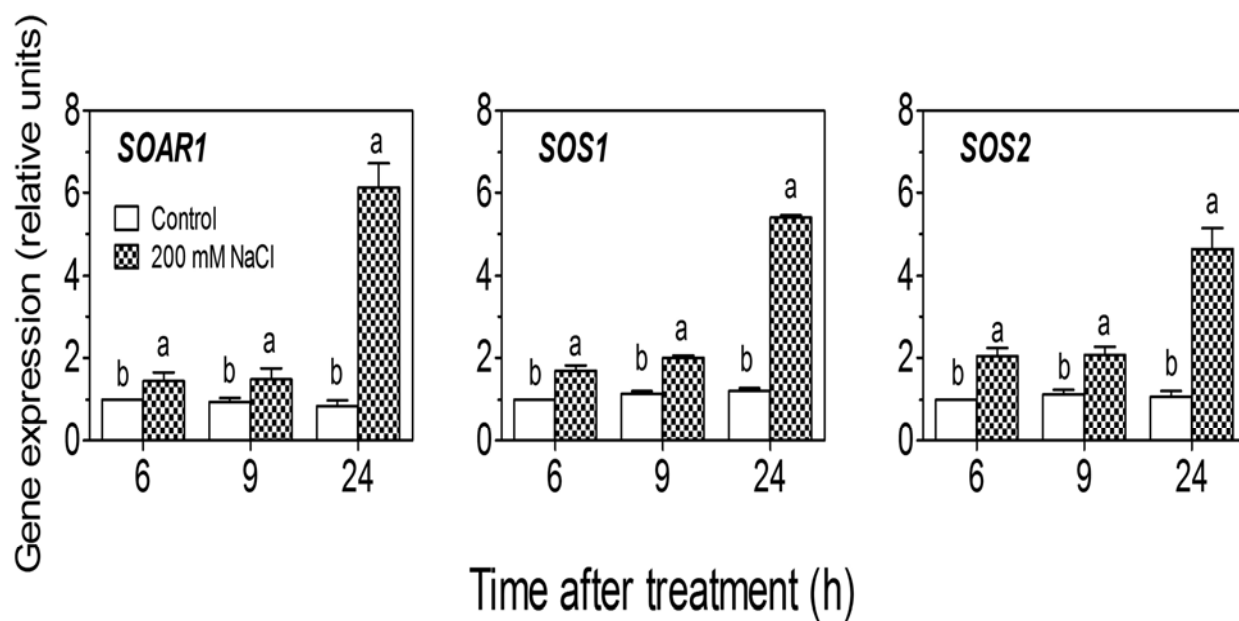

**Fig. S3.** Expression of *SOAR1* under salt stresses. RNA samples were prepared from the 2-week-old wild-type Col seedlings treated with the NaCl-free (control) or NaCl-containing (200 mM) medium at the indicated time after the treatments. Expression levels of *SOAR1* were analyzed by quantitative real-time PCR. The gene expression levels are presented as relative units normalized relative to the value from the sample of the wild-type Col plants treated with the control solution after the treatments. Each value is the mean  $\pm$ SE of three independent determinations, and different letters indicate significant differences at  $P < 0.05$  (Duncan's multiple range test) within the same time point.

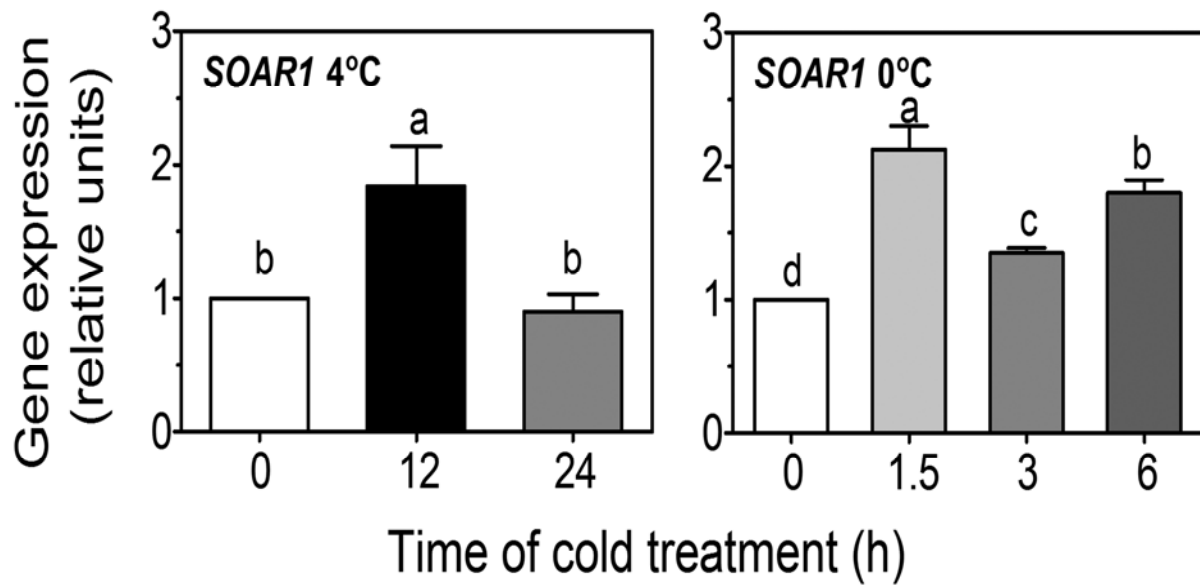

**Fig. S4.** Expression of *SOAR1* under cold stress. RNA samples were prepared from the 2-week-old wild-type Col seedlings grown under cold conditions at 4 °C or 0 °C at the indicated time point. Gene expression was analyzed by quantitative real-time PCR, of which the levels were relative units normalized relative to the value from the sample of the wild-type Col plants at the <0> time point (as 1). Each value is the mean  $\pm$ SE of three independent determinations, and different letters indicate significant differences at  $P < 0.05$  (Duncan's multiple range test).

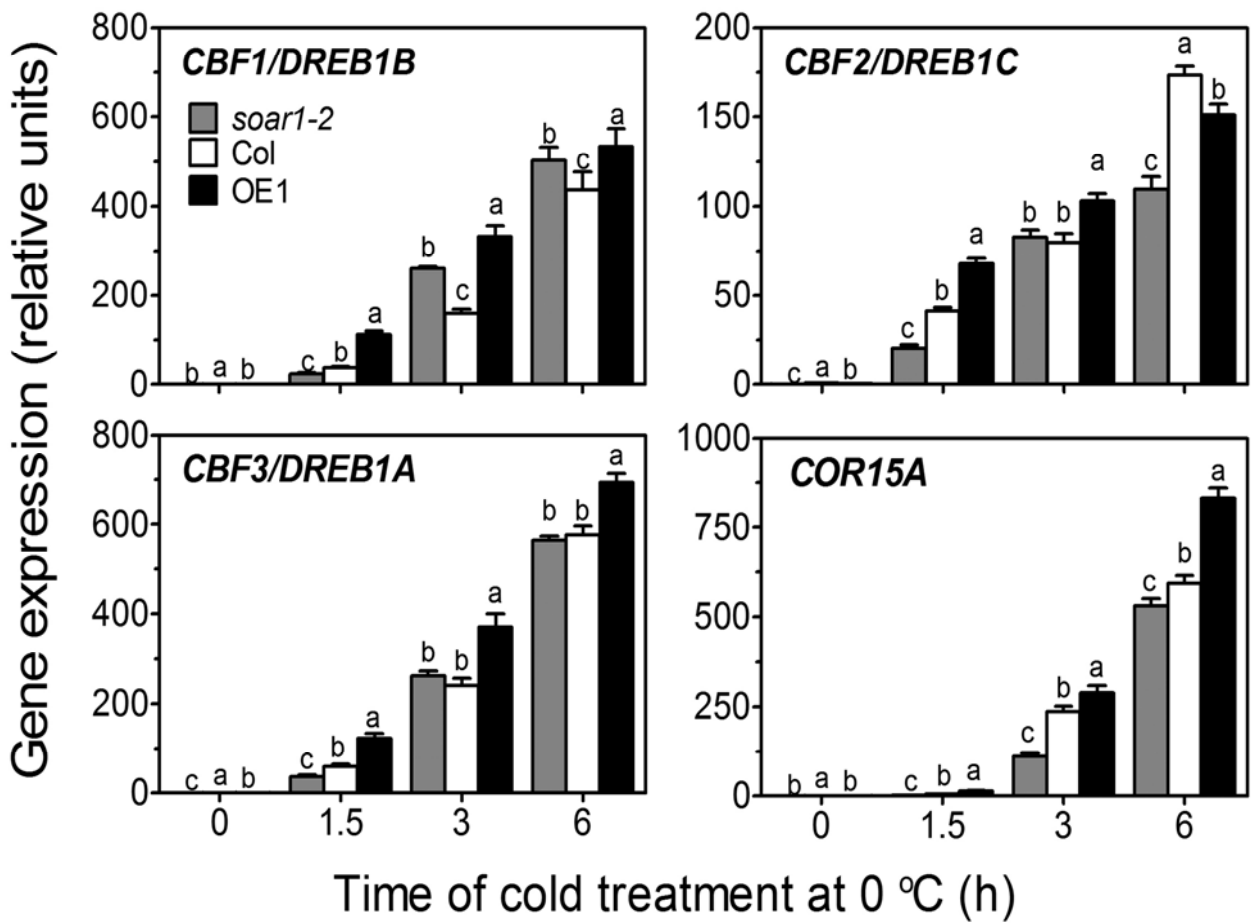

**Fig. S5.** Changes in *SOARI* expression alter expression of *CBFs* and *COR15A* under cold condition. The 2-week-old seedlings of wild-type Col, *soar1-2* mutant and a *SOARI*-overexpression line OE1 were subjected to cold treatment at 0 °C, and sampled for quantitative real-time PCR analysis at the indicated time points after the treatment. The gene expression levels were relative units normalized relative to the value from the sample of the wild-type Col plants (as 1). Each value is the mean  $\pm$ SE of three biological determinations, and different letters indicate significant differences at  $P < 0.05$  (Duncan's multiple range test) within the same time point.

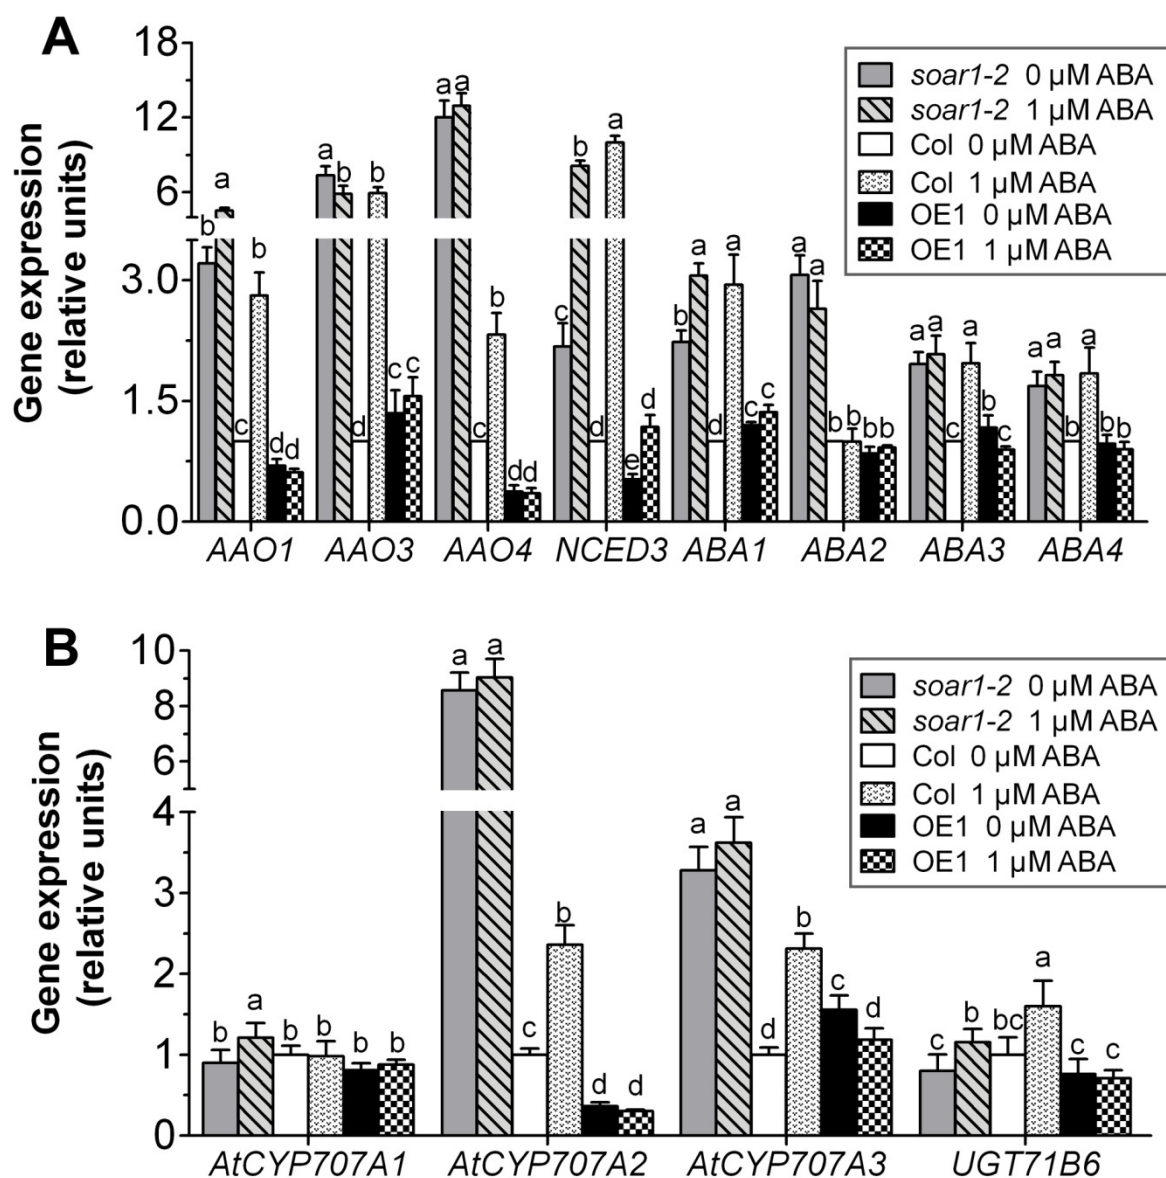

**Fig. S6.** Changes in *SOAR1* expression alter expression of a subset of ABA biosynthesis- and catabolism-related genes. RNA sample was extracted from the germinating seeds of different genotypes treated with the ABA-free (0  $\mu$ M) or 1  $\mu$ M-ABA-containing solution 24 h after three-day stratification, and the gene expression levels of ABA biosynthetic enzyme-encoding genes *AAO1*, *AAO3*, *AAO4*, *ABA1-4* and *NCED3*, as well as ABA catabolic enzyme-encoding genes *AtCYP707A1*, *AtCYP707A2*, *AtCYP707A3* and *UGT71B6* were analyzed by quantitative real-time PCR. The gene expression levels were relative units normalized relative to the value from the sample of the wild-type Col plants (as 1). Each value is the mean  $\pm$ SE of three biological determinations, and different letters indicate significant differences at  $P < 0.05$  (Duncan's multiple range test) among the treatments within the same gene.

|           |                                                                                                           |     |
|-----------|-----------------------------------------------------------------------------------------------------------|-----|
| <i>At</i> | MNSLFTAFFRR...NLLLNPNPHRNFFLHRLSSSSRRSS...PLIPVEPLIQIQSPAVPDSCTTPPQQ...NTVSKTDLSLISNLENTDVPVGSLL          | 88  |
| <i>Vv</i> | MKALFLLPKHRFLLSLTSLFHTNPNPNLNFQRPPFHKLIN.....RPPSYRHWDLPIPTLKQSLNPNPNPNFSQSDFSICALTDPALSSGAPL             | 90  |
| <i>Rc</i> | MK.YLIKFKVR...ISLSIASKPTACRFLLSSSPDSP.....RHRRRPKWTPPLPEKLPSPATAN..PNYSHSDFSILCNLSDPNLKP...L              | 76  |
| <i>Pt</i> | MKSSLLNFHKNTLLLVVFLTRRKPPHNRHFSAVSSAESWLAQGNPLIKWPHNENLAPSPSADQONSPTNSNPNYHQNDFFILCNLTKDKPKIQLGPSL        | 100 |
| <i>Sb</i> | .....MMVEMLP.....PTPTAAAEEVLSILRGADAARL...                                                                | 28  |
| <i>Os</i> | .....MLAREPGLRAASTLND...SAAAAASLVLSTLRGEDPAS....                                                          | 36  |
| Consensus | 1                                                                                                         |     |
| <i>At</i> | ESADDETCGDEPSVELVHALFDRLSSSEM.LLHSVFKWAEMKPGFTLSPSLFDSVVNSLCKAREEIEAWSVDRVRSDEGSNLVSADTFVILIRRYARAC       | 187 |
| <i>Vv</i> | EDALNRRTGKPECSGLQAIFSHFDASEK.PFTFLFRWAMKQPGFESSMTLNFNSMIDVLAKSRAEDSAWLVLDRIEGGEEPELVSSNTFFVILIRRYARAC     | 189 |
| <i>Rc</i> | ETADDTGIRPEPETSLLNAVFDHFNSSSEK.LLHSVFWADKQPEFESSMTLNFNSVINALGKMKEDSAWCVLDRTG.....LVSSDTFFVILIRRYARAC      | 169 |
| <i>Pt</i> | RTALDRRTGPELGLIQSVFDHFDSSSEK.LLHSVFLWAEKKPGFQSSAALFNMSVNLGKAREEGSAWCVLDRIEGGEGDLVSSDTFFVILIRRYARAC        | 199 |
| <i>Sb</i> | ...IPASGIRPTPELQHLRPAALPTTSDSAIPALARWAG.....AATAVSLIASRRIBAAAWRGLLPPPAAS.SP PPPPLAAAFVILIRRYARAC          | 113 |
| <i>Os</i> | ...IPAAIGDPCPAVQQLRPSLPTVSDSAPALARWAG.....EATAVSLITSRGLBAAAWRGLIAP....SPTPPPLAAAFVILIRRYARAC              | 117 |
| Consensus | l gi p p wa l f aw f l rry r g                                                                            |     |
| <i>At</i> | MVQQAIRAFEFARSYEFVCKSAATE.....LRLEVLDDALCKEGHVRASMYLERIGGTMDSNVVSVRIENILLNGWFRSRRLKQAEKILWEMKA            | 278 |
| <i>Vv</i> | MTLSAIRTEEFASFSLDSIRDRDSE.....WSLEKILLDSLCKEGHVRVASEYFDQQR.GLDPSVPSIRVYNVLLNGWFRSRRLKRAEQLRWRMKR          | 279 |
| <i>Rc</i> | MPQSAIRTEEFYASLDFICDYN.....DALEILLDSLCKEGHVRVAKYFDYDRK.QLDSCVLPHVRIYNLMLNGWFRSRRLKHAERLWLEMKK             | 258 |
| <i>Pt</i> | MSEAAIRTEEFYASLDLIHNSEAG.....TSLFEILLDSLCKEGHVRVADYFDRKV.EKDPQVPSVRIYNLMLNGWFRSRRLKHAERLWLEMKK            | 289 |
| <i>Sb</i> | RTDSAAIRAFRFLQRHPGCVAVESSDGAPEAAEAVSPLILVLDALCKEGHPRAAARLVAQVR.REDDGVAIDVRIYNLMLNGWFRSRRLDVKELWAAWRD      | 212 |
| <i>Os</i> | RAPAIAIRAFQFLRRHPDRYMAGGD....IPAAASLINMAVDLCKEGHPRAAVELERWR.REEPDSDPEERAYNILLHGWSRAGRLDKVKLWABMRL         | 211 |
| Consensus | a r f d lckegh r a p r n l g w r l l w m                                                                  |     |
| <i>At</i> | MNVKPIVVVYGTLECYCRMRRVQIAMEVLEEVKMAEMENFMVFNPIIDGLCEAGRISEALGMMERFVFCESGPIITVYNSLVKNECKAGDIFGASKIL        | 378 |
| <i>Vv</i> | ENVKPIVVVYGTLEVECYCRMRRSEKALEVGMGRGKTEENVIYVNPIDSLAEAGRFKEAMGMMERCLVSETGPIITSTYNSLVKNECKAGDIFGASKVL       | 379 |
| <i>Rc</i> | NNVSESVVYGTLEVECYCRMRRVERALELVDVVRKEGIEENALVYNPIDALAEAGRFKEVSGMMERYLQESGPIITSTYNSLVKNECKAGDIFGASKVL       | 358 |
| <i>Pt</i> | KNVKPSVVVYGTLEVECYCRMRRVERALELVDVMKRECHKSNAIVYNPIDALAEAGRFKEVGLGMMERFLCEEPIITSTYNSLVKNECKAGDIFGASKIL      | 389 |
| <i>Sb</i> | EGVRFPIVVVYGTLEIDAYCVMRPDAQMTLLDQVREEGICQANLLTQNPVYVALAQAGRFQDAHKVLEKPEPLYGVSPNISTENSLVFEYCKHCDIFGASGVIL  | 312 |
| <i>Os</i> | AGVRFPIVVVYGTLEIGLQVRRPDAQMTLLDQVREEGIEANLLTQNPVYVALAQAGRFQDAHKVLEKPEPLYGVAPNISTENSLVMYCKHCDIFGASSVIL     | 311 |
| Consensus | v p vvygt rr a m n npi l gr e p it nslv ck d gas l                                                        |     |
| <i>At</i> | KMMTRCVDPTITTYNFFRKYFSKHNKTEEGMNLTKLLEAGHSPDRITTYHLIKMLCEDGKISTAMOVNEMKNNR CIDPDLITITMLTHLLORLEMLEE       | 478 |
| <i>Vv</i> | KMVISRCFDPITLTYNFFRKYFSRCGKTEEGMNLTKLLEAGHSPDRITTYHLIKMLCEBERLIDLAVQVSKEMRARCDDLDLATSTMLTHLLCKMHRLEE      | 479 |
| <i>Rc</i> | KMVISRCFVPTITTYNFFRHFYKFGMTEEGMNLTKLLEAGHSPDRITTYHLIKMLCEBERLIDLAVQVSKEMRARCDDMDLATSTMLTHLLFORMHRFEE      | 458 |
| <i>Pt</i> | KMVISREVEPTITTYNFFRHFYKCRKTEEGMNLTKLLEAGHSPDRITTYHLIKMLCEBERLIDLAVQVSKEMRARCDDMDLATSTMLTHLLCKMQRFEE       | 489 |
| <i>Sb</i> | KAMLRCICISPTIATYNYFEMVFSRNRSIETEGMNLTKLLEAGHSPDRITTYHLIKMLCEANRLEITLOMLQEMNNGCFEPDQATSTMLTHLLORRHQFEE     | 412 |
| <i>Os</i> | KVMTERCISPTITTYNFFEMTEAKNSDVESGMNFKYKMI GNCYSPDRLTYHLIKMLSRANRLEITVQMIQEMRTHCFEPDLATSTMLTHLLORRHQFEE      | 411 |
| Consensus | k m r pt tyn ff f e gmn y k g pd t l km l l q em g d t tm hl c ee                                         |     |
| <i>At</i> | AEAEFEDNAVRRGIIPOYITFKMIDNGTRSKCMSDMAKRISLMSLPHSKKLENTYREAVDAPPDKDRRKSILHRFAEMSDVLKCRNERKLVKMRGSHK        | 578 |
| <i>Vv</i> | AEAEFEDMIRRGIVPOYITFERMNAIRKRCLETEMARKICDMASVPHSKKLENTYSGDGDASR..ARKTSILQRAEAMSDILKTONDPRELVKRRSSFE       | 577 |
| <i>Rc</i> | AEAEFEDMIRGIVPOYITFORLNDETRKRCMVERARKISDMYSSVPHSKKLENTYSGEADLR..ARRSSILQKAEAMSKLKTNDPRELVKLRKSSSQ         | 557 |
| <i>Pt</i> | AEAEFEDMLRRGIVPOYITFHRLNDETRKQCLTELARRIKLMSVSSHKNLENTYNVDRDASRH..ARRKSILQKAGVMSIILKTONDPRELVKRRSSSQ       | 588 |
| <i>Sb</i> | AEAEFEQAFRRGIVPOYITFRMLMKEIKRILCLVQLVQKLDIMRSVPHSKKLENTYSGEADLR..DKEGDDAIEKKKSILKCAVSDVLKCDKDKKLEKLDPEE   | 511 |
| <i>Os</i> | ACAEEFEDMIRRGIVPOYITQKLMREIKRILCLVHLIQKLTNIMRSVPHSKKLENTYSGEADLR..DKEGDDSMKRRKILILKCAVSDVLKCDKDKKLEKLDPEE | 510 |
| Consensus | a ef gi pqy t g l m s hs lp y i a s lk c p l k                                                            |     |
| <i>At</i> | KAVGEDINLIDDINEVNGDAGDFE.....                                                                             | 602 |
| <i>Vv</i> | NTVLVADQIILEDIKRANKT.....                                                                                 | 597 |
| <i>Rc</i> | NPITSAIQLIENIRKRVNKI.....                                                                                 | 577 |
| <i>Pt</i> | NPESSANQIILEDIKRANKT.....                                                                                 | 607 |
| <i>Sb</i> | TDVQVADRIVANIRRVYVY..DVLRIVPSV                                                                            | 539 |
| <i>Os</i> | TDVEVADRIVANIRRSVYGGASTSSVMAPL                                                                            | 540 |
| Consensus | i                                                                                                         |     |

**Fig. S7.** Alignment of amino acid sequence of SOAR1 in different plant species. The homologous sequence was aligned by ClustalX2 (<http://www.clustal.org/>). The abbreviation of plant species: *At*, *Arabidopsis thaliana*; *Vv*, *Vitis vinifera*; *Rc*, *Ricinus communis*; *Pt*, *Populus trichocarpa*; *Sb*, *Sorghum bicolor*; *Os*, *Oryza sativa*. The black background represents the identical amino acid residues, and the dark grey background represents the similarity more than 75%, and the light grey background represents the similarity more than 50%. The numbers in the left of the sequence indicate the number of predicted amino acid residues. The dot represents the gap in order to maximize alignment.

**Table S1.** Primers for quantitative real-time PCR used in this study.

Abbreviations: for, forward primer; rev, reverse primer

| <b>Gene</b>            | <b>Primer sequence</b>            |
|------------------------|-----------------------------------|
| <i>Actin2/8</i> for    | 5'-GGTAACATTGTGCTCAGTGGTGG-3'     |
| <i>Actin2/8</i> rev    | 5'-AACGACCTTAATCTTCATGCTGC-3'     |
| <i>SOAR1</i> for       | 5'-TACGGAAGTTAGGTTGCTTGAG-3'      |
| <i>SOAR1</i> rev       | 5'-ACAACAGTCGGCTTCACATTC-3'       |
| <i>ABI1</i> for        | 5'-AGAGTGTGCCTTTGTATGGTTTTA-3'    |
| <i>ABI1</i> rev        | 5'-CATCCTCTCTCTACAATAGTTCGCT-3'   |
| <i>ABI2</i> for        | 5'-GATGGAAGATTCTGTCTCAACGATT-3'   |
| <i>ABI2</i> rev        | 5'-GTTTCTCCTTCACTATCTCCTCCG-3'    |
| <i>RD29A</i> for       | 5'-ATCACTTGGCTCCACTGTTGTTC-3'     |
| <i>RD29A</i> rev       | 5'-ACAAAACACACATAAACATCCAAAGT-3'  |
| <i>RD29B</i> for       | 5'-CTTGGCACCACCGTTGGGACTA-3'      |
| <i>RD29B</i> rev       | 5'-TCAGTTCCCA GAATCTTGAAGT-3'     |
| <i>P5CS1</i> for       | 5'-CGACATGGGAGTGCACACACAGAC-3'    |
| <i>P5CS1</i> rev       | 5'-CCTCTCATTATCCATCTCGTTG-3'      |
| <i>SOS1</i> for        | 5'-GGCAGCATGGTTAATGTGTAC-3'       |
| <i>SOS1</i> rev        | 5'-TTCATCTTCTTCATCGCTTG-3'        |
| <i>SOS2</i> for        | 5'-ATTTGACAGGCGACAGGATTTTG-3'     |
| <i>SOS2</i> rev        | 5'-GCCACCTCGTAAATCTCTATC-3'       |
| <i>SOS3</i> for        | 5'-TCATCGAGCGAGAAGAATTG-3'        |
| <i>SOS3</i> rev        | 5'-CGTCCTATTTATGTCCTTTAG-3'       |
| <i>OST1</i> for        | 5'-GATCCCGAGGAACCAAAGAA-3'        |
| <i>OST1</i> rev        | 5'-ATCCTCTTTGCAGGGTCAGC-3'        |
| <i>ABF4</i> for        | 5'-ACAACCTTAGGAGGTGGTGGTC-3'      |
| <i>ABF4</i> rev        | 5'-CTTCAGGAGTTCATCCATGTTC-3'      |
| <i>DREB2A</i> for      | 5'-AAGGTAAAGGAGGACCAGAG-3'        |
| <i>DREB2A</i> rev      | 5'-ACACAACCAGGAGTCTCAAC-3'        |
| <i>CBF1/DREB1B</i> for | 5'-GCATGTCTCAACTTCGCTGA-3'        |
| <i>CBF1/DREB1B</i> rev | 5'-ATCGTCTCCTCCATGTCCAG-3'        |
| <i>CBF2/DREB1C</i> for | 5'-TGACGTGTCCTTATGGAGCTA-3'       |
| <i>CBF2/DREB1C</i> rev | 5'-CTGCACTCAAAAACATTTGCA-3'       |
| <i>CBF3/DREB1A</i> for | 5'-GATGACGACGTATCGTTATGGA-3'      |
| <i>CBF3/DREB1A</i> rev | 5'-TACACTCGTTTCTCAGTTTTACAAAC-3'  |
| <i>COR15A</i> for      | 5'-GCTTCAGATTTCTGTGACGGATAAAAC-3' |
| <i>COR15A</i> rev      | 5'-GCAAAACATTAAAGAATGTGACGGTG-3'  |
| <i>COR15B</i> for      | 5'-AAAGCAGAGTGGTGTGGTACCGT-3'     |
| <i>COR15B</i> rev      | 5'-TCATCGAGGATGTTGCCGTCACCT-3'    |
| <i>COR47</i> for       | 5'-CAGTGTGCGAGAGTGTGGTG-3'        |
| <i>COR47</i> rev       | 5'-ACAGCTGGTGAATCCTCTGC-3'        |
| <i>COR414</i> for      | 5'-AGCATTCTTGCGCTTATTGCTCG-3'     |
| <i>COR414</i> rev      | 5'-TCCCTGCTCGTGAGAAATGTTGGA-3'    |
| <i>ICE1</i> for        | 5'-TCCTAAAGGCCAGCAAGCTA-3'        |



| <b>Gene</b>           | <b>Primer sequence</b>               |
|-----------------------|--------------------------------------|
| <i>ICE1</i> rev       | 5'-CTCTTGTCTTCTTGGCATTG-3'           |
| <i>SIZ1</i> for       | 5'-ATAGCGCCTCTGGGAATCAT-3'           |
| <i>SIZ1</i> rev       | 5'-GCCTTGTCTTGTCTACTGTTCATTTCATAC-3' |
| <i>MYB15</i> for      | 5'-GGTGCGGATATCGATGAAAAG-3'          |
| <i>MYB15</i> rev      | 5'-CATTATTAGCGGAGCCCAAG-3'           |
| <i>FAD2</i> for       | 5'-CCAAAGCAGAAATCAGCAATCA-3'         |
| <i>FAD2</i> rev       | 5'-GCAGCAGCGTAACGGTAAAGAC-3'         |
| <i>KIN1</i> for       | 5'-TGGAGCTGGAGCACAACA-3'             |
| <i>KIN1</i> rev       | 5'-GACCCGAATCGCTACTTGTTC-3'          |
| <i>SUS1</i> for       | 5'-TTCTGGAAGCATGTCTCGAA-3'           |
| <i>SUS1</i> rev       | 5'-GTGCAAGAGGAACAGCCTGA-3'           |
| <i>ABA1</i> for       | 5'-TCACTGACAAAGCCGATGACC-3'          |
| <i>ABA1</i> rev       | 5'-CGAAACGCAACAATCGTCG-3'            |
| <i>ABA2</i> for       | 5'-AAGCATGAAACATGCAGCTCG-3'          |
| <i>ABA2</i> rev       | 5'-AAGAATGTGGACCAACGCCTC-3'          |
| <i>ABA3</i> for       | 5'-TAGTGAAGAAATCCAATGAGCCCT-3'       |
| <i>ABA3</i> rev       | 5'-CTTCTTCCCCAACTCCAATCCAA-3'        |
| <i>ABA4</i> for       | 5'-GACTCTTGCTTCTGCTTGGATTC-3'        |
| <i>ABA4</i> rev       | 5'-AGAAGGCAAAGTGAAACCGAATG-3'        |
| <i>NCED3</i> for      | 5'-AGCCGCCATTATCGTCTTCTC-3'          |
| <i>NCED3</i> rev      | 5'-GGAGTGTGAAGCGCAGATGAA-3'          |
| <i>AAO1</i> for       | 5'-TGCTCTGTTTTTGTGGTTTG-3'           |
| <i>AAO1</i> rev       | 5'-CACAATCCATTGCCATCGACAT-3'         |
| <i>AAO3</i> for       | 5'-TCCATCATGGACTGCTCCTTC-3'          |
| <i>AAO3</i> rev       | 5'-CGAGACACTAGCGCCAAGAAA-3'          |
| <i>AAO4</i> for       | 5'-CAACAGTGGTCATCACAAGAACC-3'        |
| <i>AAO4</i> rev       | 5'-GGAACCGGTAAC TCAAACCAAG-3'        |
| <i>AtCYP707A1</i> for | 5'-CAAAACCCAATACGTTTCATGCCA-3'       |
| <i>AtCYP707A1</i> rev | 5'-CTCGCTCCAACAATTGACCAAAC-3'        |
| <i>AtCYP707A2</i> for | 5'-CAAGAAAAATGCCACTGACCACT-3'        |
| <i>AtCYP707A2</i> rev | 5'-TCCAACCCTTTGGGATCAAGTAG-3'        |
| <i>AtCYP707A3</i> for | 5'-TCTCAATACTCGGCAAAGACGAA-3'        |
| <i>AtCYP707A3</i> rev | 5'-GAGCTTTCATGGCTTTGTGGAAT-3'        |
| <i>UGT71B6</i> for    | 5'-GGTTCAGTGAGGAACAAGTGAGA-3'        |
| <i>UGT71B6</i> rev    | 5'-TAACCTTTCCTCTGTTAGCCGTC-3'        |

**Table S2.** Duncan's multiple range tests for the data of the water loss rate presented in Fig. 1B. Different letters indicate significant differences at  $P < 0.05$ .

| <b>Time (h)</b> | <b>Genotype</b> | <b>Mean</b> | <b>Significance of difference 0.05</b> | <b>Time (h)</b> | <b>Genotype</b> | <b>Mean</b> | <b>Significance of difference 0.05</b> |
|-----------------|-----------------|-------------|----------------------------------------|-----------------|-----------------|-------------|----------------------------------------|
| <b>1</b>        | Col             | 5.3         | <b>c</b>                               | <b>2</b>        | Col             | 8.9         | <b>d</b>                               |
|                 | <i>soar1-2</i>  | 6.8         | <b>c</b>                               |                 | <i>soar1-2</i>  | 11.8        | <b>c</b>                               |
|                 | <i>soar1-3</i>  | 10.2        | <b>b</b>                               |                 | <i>soar1-3</i>  | 16.9        | <b>b</b>                               |
|                 | OE1             | 4.5         | <b>cd</b>                              |                 | OE1             | 7.7         | <b>e</b>                               |
|                 | OE6             | 3.5         | <b>d</b>                               |                 | OE6             | 6.4         | <b>e</b>                               |
|                 | ABI2-OE         | 16.4        | <b>a</b>                               |                 | ABI2-OE         | 28.7        | <b>a</b>                               |
| <b>3</b>        | Col             | 13.1        | <b>d</b>                               | <b>4</b>        | Col             | 16.4        | <b>d</b>                               |
|                 | <i>soar1-2</i>  | 16.9        | <b>c</b>                               |                 | <i>soar1-2</i>  | 21.8        | <b>c</b>                               |
|                 | <i>soar1-3</i>  | 25.8        | <b>b</b>                               |                 | <i>soar1-3</i>  | 32.9        | <b>b</b>                               |
|                 | OE1             | 11.6        | <b>e</b>                               |                 | OE1             | 15.4        | <b>de</b>                              |
|                 | OE6             | 9.8         | <b>e</b>                               |                 | OE6             | 12.4        | <b>e</b>                               |
|                 | ABI2-OE         | 38.6        | <b>a</b>                               |                 | ABI2-OE         | 50.4        | <b>a</b>                               |
| <b>5</b>        | Col             | 19.3        | <b>d</b>                               | <b>6</b>        | Col             | 23.1        | <b>d</b>                               |
|                 | <i>soar1-2</i>  | 26.1        | <b>c</b>                               |                 | <i>soar1-2</i>  | 30.1        | <b>c</b>                               |
|                 | <i>soar1-3</i>  | 37.6        | <b>b</b>                               |                 | <i>soar1-3</i>  | 42.9        | <b>b</b>                               |
|                 | OE1             | 17.9        | <b>de</b>                              |                 | OE1             | 20.8        | <b>de</b>                              |
|                 | OE6             | 15.2        | <b>e</b>                               |                 | OE6             | 17.4        | <b>e</b>                               |
|                 | ABI2-OE         | 56.8        | <b>a</b>                               |                 | ABI2-OE         | 62.9        | <b>a</b>                               |
| <b>7</b>        | Col             | 26.2        | <b>d</b>                               | <b>8</b>        | Col             | 29.1        | <b>d</b>                               |
|                 | <i>soar1-2</i>  | 34.5        | <b>c</b>                               |                 | <i>soar1-2</i>  | 38.5        | <b>c</b>                               |
|                 | <i>soar1-3</i>  | 48.4        | <b>b</b>                               |                 | <i>soar1-3</i>  | 52.4        | <b>b</b>                               |
|                 | OE1             | 24.5        | <b>de</b>                              |                 | OE1             | 27.8        | <b>de</b>                              |
|                 | OE6             | 20.4        | <b>e</b>                               |                 | OE6             | 22.9        | <b>e</b>                               |
|                 | ABI2-OE         | 67.8        | <b>a</b>                               |                 | ABI2-OE         | 69.7        | <b>a</b>                               |

**Table S3.** Duncan's multiple range tests for the data of the seed germination rate of the controls presented in Fig. 2A and 2C. Different letters indicate significant differences at  $P < 0.05$ .

| <b>Time (h)</b> | <b>Genotype</b> | <b>Mean</b> | <b>Significance of difference 0.05</b> | <b>Time (h)</b> | <b>Genotype</b> | <b>Mean</b> | <b>Significance of difference 0.05</b> |
|-----------------|-----------------|-------------|----------------------------------------|-----------------|-----------------|-------------|----------------------------------------|
| <b>0</b>        | Col             | 0           | <b>a</b>                               | <b>24</b>       | Col             | 8.1         | <b>d</b>                               |
|                 | <i>soar1-2</i>  | 0           | <b>a</b>                               |                 | <i>soar1-2</i>  | 0           | <b>e</b>                               |
|                 | <i>soar1-3</i>  | 0           | <b>a</b>                               |                 | <i>soar1-3</i>  | 0           | <b>e</b>                               |
|                 | OE1             | 0           | <b>a</b>                               |                 | OE1             | 20.1        | <b>b</b>                               |
|                 | OE3             | 0           | <b>a</b>                               |                 | OE3             | 15.8        | <b>c</b>                               |
|                 | OE6             | 0           | <b>a</b>                               |                 | OE6             | 55.7        | <b>a</b>                               |
|                 | ABI2-OE         | 0           | <b>a</b>                               |                 | ABI2-OE         | 7.8         | <b>d</b>                               |
| <b>36</b>       | Col             | 81.6        | <b>b</b>                               | <b>48</b>       | Col             | 95          | <b>a</b>                               |
|                 | <i>soar1-2</i>  | 48.8        | <b>c</b>                               |                 | <i>soar1-2</i>  | 91.4        | <b>b</b>                               |
|                 | <i>soar1-3</i>  | 42.7        | <b>d</b>                               |                 | <i>soar1-3</i>  | 76.3        | <b>c</b>                               |
|                 | OE1             | 91.2        | <b>a</b>                               |                 | OE1             | 95          | <b>a</b>                               |
|                 | OE3             | 80          | <b>b</b>                               |                 | OE3             | 95.8        | <b>a</b>                               |
|                 | OE6             | 92.3        | <b>a</b>                               |                 | OE6             | 96.1        | <b>a</b>                               |
|                 | ABI2-OE         | 83.4        | <b>b</b>                               |                 | ABI2-OE         | 93          | <b>b</b>                               |
| <b>60</b>       | Col             | 97.9        | <b>ab</b>                              | <b>72</b>       | Col             | 98.9        | <b>a</b>                               |
|                 | <i>soar1-2</i>  | 97.6        | <b>ab</b>                              |                 | <i>soar1-2</i>  | 98.4        | <b>a</b>                               |
|                 | <i>soar1-3</i>  | 97.2        | <b>ab</b>                              |                 | <i>soar1-3</i>  | 99.1        | <b>a</b>                               |
|                 | OE1             | 97          | <b>ab</b>                              |                 | OE1             | 98.3        | <b>a</b>                               |
|                 | OE3             | 97.5        | <b>ab</b>                              |                 | OE3             | 98.3        | <b>a</b>                               |
|                 | OE6             | 98.1        | <b>a</b>                               |                 | OE6             | 99.1        | <b>a</b>                               |
|                 | ABI2-OE         | 96.5        | <b>b</b>                               |                 | ABI2-OE         | 98.2        | <b>a</b>                               |
| <b>96</b>       | Col             | 100         | <b>a</b>                               | <b>120</b>      | Col             | 100         | <b>a</b>                               |
|                 | <i>soar1-2</i>  | 100         | <b>a</b>                               |                 | <i>soar1-2</i>  | 100         | <b>a</b>                               |
|                 | <i>soar1-3</i>  | 100         | <b>a</b>                               |                 | <i>soar1-3</i>  | 100         | <b>a</b>                               |
|                 | OE1             | 100         | <b>a</b>                               |                 | OE1             | 100         | <b>a</b>                               |
|                 | OE3             | 100         | <b>a</b>                               |                 | OE3             | 100         | <b>a</b>                               |
|                 | OE6             | 100         | <b>a</b>                               |                 | OE6             | 100         | <b>a</b>                               |
|                 | ABI2-OE         | 100         | <b>a</b>                               |                 | ABI2-OE         | 100         | <b>a</b>                               |

**Table S4.** Duncan's multiple range tests for the data of the seed germination rates of the D-mannitol (300 mM) treatment presented in Fig. 2A. Different letters indicate significant differences at  $P < 0.05$ .

| <b>Time (h)</b> | <b>Genotype</b> | <b>Mean</b> | <b>Significance of difference 0.05</b> | <b>Time (h)</b> | <b>Genotype</b> | <b>Mean</b> | <b>Significance of difference 0.05</b> |
|-----------------|-----------------|-------------|----------------------------------------|-----------------|-----------------|-------------|----------------------------------------|
| <b>0</b>        | Col             | 0           | <b>a</b>                               | <b>24</b>       | Col             | 0           | <b>a</b>                               |
|                 | <i>soar1-2</i>  | 0           | <b>a</b>                               |                 | <i>soar1-2</i>  | 0           | <b>a</b>                               |
|                 | <i>soar1-3</i>  | 0           | <b>a</b>                               |                 | <i>soar1-3</i>  | 0           | <b>a</b>                               |
|                 | OE1             | 0           | <b>a</b>                               |                 | OE1             | 0           | <b>a</b>                               |
|                 | OE3             | 0           | <b>a</b>                               |                 | OE3             | 0           | <b>a</b>                               |
|                 | OE6             | 0           | <b>a</b>                               |                 | OE6             | 0           | <b>a</b>                               |
|                 | ABI2-OE         | 0           | <b>a</b>                               |                 | ABI2-OE         | 0           | <b>a</b>                               |
| <b>36</b>       | Col             | 0           | <b>d</b>                               | <b>48</b>       | Col             | 0           | <b>e</b>                               |
|                 | <i>soar1-2</i>  | 0           | <b>d</b>                               |                 | <i>soar1-2</i>  | 0           | <b>e</b>                               |
|                 | <i>soar1-3</i>  | 0           | <b>d</b>                               |                 | <i>soar1-3</i>  | 0           | <b>e</b>                               |
|                 | OE1             | 1.5         | <b>b</b>                               |                 | OE1             | 17.8        | <b>b</b>                               |
|                 | OE3             | 0.8         | <b>c</b>                               |                 | OE3             | 15.6        | <b>c</b>                               |
|                 | OE6             | 12.2        | <b>a</b>                               |                 | OE6             | 30.5        | <b>a</b>                               |
|                 | ABI2-OE         | 0           | <b>d</b>                               |                 | ABI2-OE         | 5.5         | <b>d</b>                               |
| <b>60</b>       | Col             | 13          | <b>e</b>                               | <b>72</b>       | Col             | 25          | <b>d</b>                               |
|                 | <i>soar1-2</i>  | 0           | <b>f</b>                               |                 | <i>soar1-2</i>  | 3.8         | <b>e</b>                               |
|                 | <i>soar1-3</i>  | 0           | <b>f</b>                               |                 | <i>soar1-3</i>  | 4.3         | <b>e</b>                               |
|                 | OE1             | 78.5        | <b>b</b>                               |                 | OE1             | 92.6        | <b>a</b>                               |
|                 | OE3             | 55.5        | <b>c</b>                               |                 | OE3             | 76.6        | <b>b</b>                               |
|                 | OE6             | 81.7        | <b>a</b>                               |                 | OE6             | 92.7        | <b>a</b>                               |
|                 | ABI2-OE         | 36.7        | <b>d</b>                               |                 | ABI2-OE         | 63.3        | <b>c</b>                               |
| <b>96</b>       | Col             | 82          | <b>d</b>                               | <b>120</b>      | Col             | 88          | <b>c</b>                               |
|                 | <i>soar1-2</i>  | 20.9        | <b>f</b>                               |                 | <i>soar1-2</i>  | 22.8        | <b>e</b>                               |
|                 | <i>soar1-3</i>  | 38.4        | <b>e</b>                               |                 | <i>soar1-3</i>  | 48.5        | <b>d</b>                               |
|                 | OE1             | 98.5        | <b>a</b>                               |                 | OE1             | 99.3        | <b>a</b>                               |
|                 | OE3             | 89.8        | <b>c</b>                               |                 | OE3             | 93.8        | <b>b</b>                               |
|                 | OE6             | 97.6        | <b>a</b>                               |                 | OE6             | 100         | <b>a</b>                               |
|                 | ABI2-OE         | 93.6        | <b>b</b>                               |                 | ABI2-OE         | 98.2        | <b>a</b>                               |

**Table S5.** Duncan's multiple range tests for the data of the seed germination rate under NaCl (175 mM) treatment presented in Fig. 2C. Different letters indicate significant differences at  $P < 0.05$ .

| Time (h)  | Genotype       | Mean | Significance of difference 0.05 | Time (h)   | Genotype       | Mean | Significance of difference 0.05 |
|-----------|----------------|------|---------------------------------|------------|----------------|------|---------------------------------|
| <b>0</b>  | Col            | 0    | <b>a</b>                        | <b>24</b>  | Col            | 0    | <b>a</b>                        |
|           | <i>soar1-2</i> | 0    | <b>a</b>                        |            | <i>soar1-2</i> | 0    | <b>a</b>                        |
|           | <i>soar1-3</i> | 0    | <b>a</b>                        |            | <i>soar1-3</i> | 0    | <b>a</b>                        |
|           | OE1            | 0    | <b>a</b>                        |            | OE1            | 0    | <b>a</b>                        |
|           | OE3            | 0    | <b>a</b>                        |            | OE3            | 0    | <b>a</b>                        |
|           | OE6            | 0    | <b>a</b>                        |            | OE6            | 0    | <b>a</b>                        |
|           | ABI2-OE        | 0    | <b>a</b>                        |            | ABI2-OE        | 0    | <b>a</b>                        |
| <b>36</b> | Col            | 0    | <b>c</b>                        | <b>48</b>  | Col            | 0    | <b>e</b>                        |
|           | <i>soar1-2</i> | 0    | <b>c</b>                        |            | <i>soar1-2</i> | 0    | <b>e</b>                        |
|           | <i>soar1-3</i> | 0    | <b>c</b>                        |            | <i>soar1-3</i> | 0    | <b>e</b>                        |
|           | OE1            | 3.4  | <b>b</b>                        |            | OE1            | 24.1 | <b>a</b>                        |
|           | OE3            | 0    | <b>c</b>                        |            | OE3            | 11.5 | <b>c</b>                        |
|           | OE6            | 9.3  | <b>a</b>                        |            | OE6            | 21.6 | <b>b</b>                        |
|           | ABI2-OE        | 0    | <b>c</b>                        |            | ABI2-OE        | 5.4  | <b>d</b>                        |
| <b>60</b> | Col            | 0    | <b>e</b>                        | <b>72</b>  | Col            | 9.8  | <b>d</b>                        |
|           | <i>soar1-2</i> | 0    | <b>e</b>                        |            | <i>soar1-2</i> | 1.8  | <b>e</b>                        |
|           | <i>soar1-3</i> | 0    | <b>e</b>                        |            | <i>soar1-3</i> | 1.4  | <b>e</b>                        |
|           | OE1            | 82.7 | <b>a</b>                        |            | OE1            | 92.2 | <b>a</b>                        |
|           | OE3            | 57.5 | <b>c</b>                        |            | OE3            | 75.2 | <b>b</b>                        |
|           | OE6            | 78.3 | <b>b</b>                        |            | OE6            | 92.8 | <b>a</b>                        |
|           | ABI2-OE        | 36.9 | <b>d</b>                        |            | ABI2-OE        | 70   | <b>c</b>                        |
| <b>96</b> | Col            | 75.7 | <b>e</b>                        | <b>120</b> | Col            | 84.8 | <b>d</b>                        |
|           | <i>soar1-2</i> | 25.4 | <b>f</b>                        |            | <i>soar1-2</i> | 65.4 | <b>e</b>                        |
|           | <i>soar1-3</i> | 35.9 | <b>f</b>                        |            | <i>soar1-3</i> | 66.1 | <b>e</b>                        |
|           | OE1            | 99.1 | <b>a</b>                        |            | OE1            | 100  | <b>a</b>                        |
|           | OE3            | 88.4 | <b>d</b>                        |            | OE3            | 92.9 | <b>c</b>                        |
|           | OE6            | 96.9 | <b>b</b>                        |            | OE6            | 96.9 | <b>b</b>                        |
|           | ABI2-OE        | 91.9 | <b>c</b>                        |            | ABI2-OE        | 100  | <b>a</b>                        |

**Table S6.** Duncan's multiple range tests for the data of the fresh weight presented in Fig. 3C. Different letters indicate significant differences at  $P < 0.05$ .

| NaCl (mM)  | Genotype             | Mean  | Significance of difference 0.05 | NaCl (mM)  | Genotype             | Mean | Significance of difference 0.05 |
|------------|----------------------|-------|---------------------------------|------------|----------------------|------|---------------------------------|
| <b>0</b>   | Col                  | 53    | <b>a</b>                        | <b>130</b> | Col                  | 6.8  | <b>d</b>                        |
|            | <i>soar1-2</i>       | 47    | <b>a</b>                        |            | <i>soar1-2</i>       | 1.17 | <b>e</b>                        |
|            | <i>soar1-3</i>       | 49    | <b>a</b>                        |            | <i>soar1-3</i>       | 1.18 | <b>e</b>                        |
|            | OE1                  | 50    | <b>a</b>                        |            | OE1                  | 28.8 | <b>b</b>                        |
|            | OE3                  | 53    | <b>a</b>                        |            | OE3                  | 34.4 | <b>a</b>                        |
|            | OE6                  | 51    | <b>a</b>                        |            | OE6                  | 27.8 | <b>c</b>                        |
|            | ABI2-OE              | 49    | <b>a</b>                        |            | ABI2-OE              | 28.7 | <b>b</b>                        |
|            | <i>abi1-3/abi2-2</i> | 43    | <b>a</b>                        |            | <i>abi1-3/abi2-2</i> | 0.64 | <b>f</b>                        |
| <b>150</b> | Col                  | 4.5   | <b>e</b>                        | <b>175</b> | Col                  | 1.02 | <b>d</b>                        |
|            | <i>soar1-2</i>       | 0.89  | <b>f</b>                        |            | <i>soar1-2</i>       | 0.33 | <b>f</b>                        |
|            | <i>soar1-3</i>       | 0.87  | <b>f</b>                        |            | <i>soar1-3</i>       | 0.39 | <b>f</b>                        |
|            | OE1                  | 23.05 | <b>a</b>                        |            | OE1                  | 15   | <b>b</b>                        |
|            | OE3                  | 20    | <b>b</b>                        |            | OE3                  | 16   | <b>a</b>                        |
|            | OE6                  | 18    | <b>c</b>                        |            | OE6                  | 13   | <b>c</b>                        |
|            | ABI2-OE              | 16    | <b>d</b>                        |            | ABI2-OE              | 13.5 | <b>c</b>                        |
|            | <i>abi1-3/abi2-2</i> | 0.65  | <b>g</b>                        |            | <i>abi1-3/abi2-2</i> | 0.64 | <b>e</b>                        |
| <b>200</b> | Col                  | 0.7   | <b>d</b>                        |            |                      |      |                                 |
|            | <i>soar1-2</i>       | 0.18  | <b>e</b>                        |            |                      |      |                                 |
|            | <i>soar1-3</i>       | 0.26  | <b>e</b>                        |            |                      |      |                                 |
|            | OE1                  | 7.9   | <b>a</b>                        |            |                      |      |                                 |
|            | OE3                  | 8.1   | <b>a</b>                        |            |                      |      |                                 |
|            | OE6                  | 3.5   | <b>c</b>                        |            |                      |      |                                 |
|            | ABI2-OE              | 5.3   | <b>b</b>                        |            |                      |      |                                 |
|            | <i>abi1-3/abi2-2</i> | 0.27  | <b>e</b>                        |            |                      |      |                                 |
